# Supplementary material for: Unprecedented metal-free 3D porous carbonaceous electrodes for full water splitting
Source: Royal Society of Chemistry journal article supplement (doi:10.1039/c5ee02996a), 2016-01-01
Supplement: c5ee02996a2.pdf [file c5ee02996a2.pdf]

## Supporting Information

### Metal-Free 3D Porous Electrode for Full Water

### Splitting at All pH Values

Jianping Lai,<sup>a,b</sup> Suping Li,<sup>a</sup> Fengxia Wu,<sup>a,b</sup> Muhammad Saqib,<sup>a,b</sup> Rafael Luque,<sup>\*,a,c</sup> and Guobao Xu<sup>\*,a</sup>

<sup>a</sup> State Key Laboratory of Electroanalytical Chemistry, Changchun Institute of Applied Chemistry, Chinese Academy of Sciences, Changchun, Jilin 130022, PR China;

<sup>b</sup> University of the Chinese Academy of Sciences, Chinese Academy of Sciences, No. 19A Yuquanlu, Beijing 100049, PR China.

<sup>c</sup> Departamento de Química Orgánica, Universidad de Córdoba Campus de Rabanales, Edificio Marie Curie (C-3), Ctra Nnal IV, Km 396, Córdoba (Spain), E-14014.

---

## Experimental Section

### Chemicals and materials.

Ammonium persulfate (APS) was purchased from Beijing Chemical Corp. Aniline and phytic acid were purchased from Sinopharm Chemical Reagent Co.Ltd. (Shanghai, China). Nafion (10%) and commercial Pt/C were purchased from Sigma-Aldrich. All chemicals were analytical-reagent grade and used without further purification. CC is provided by Tsukuba Materials Information Laboratory (*TMIL*) Ltd.

### Apparatus.

Scanning electron microscopy (SEM) images were recorded in a FEI XL30 ESEM FEG Scanning Electron Microscope operated at 25 kV. TEM images were all obtained using a FEI Tecnai G2 F20 microscope operated at 200 kV. Energy dispersive spectrometer (EDS) spectrums were collected in a Hitachi S-4800 Scanning Electron Microscope operated at 20.9 KV. X-ray diffraction (XRD) patterns were recorded on a Bruker D8 ADVANCE X-ray diffractometer (Cu K $\alpha$  radiation) in the 30 to 80° 2 $\theta$  range. The Fourier-transform infrared spectroscopy (FT-IR) spectra were recorded from KBr disks using a Perkin-Elmer GX instrument in the wavenumber range of 4000-400 cm<sup>-1</sup>. Tapping-mode AFM imaging was performed on a Digital Instruments multimode AFM controlled by a Nanoscope IIIa apparatus (Digital Instruments, Santa Barbara, CA) equipped with an E scanner. XPS measurements were performed on an ESCALABMK II X-ray photoelectron spectrometer using Mg as the exciting source. Nitrogen sorption isotherms were measured with an ASAP 2020 Physisorption Analyzer (Micrometrics Instrument Corporation).

---

### **Preoxidation of CC.**

CC was washed repeatedly with aqueous solutions of HCl (19 wt.%) and HNO<sub>3</sub> (10 wt.%), followed by washing with water. After drying, the purified CC was functionalized by oxidation treatment with concentrated HNO<sub>3</sub> (65 wt.%) at room temperature for 40 min to generate oxygen-containing functional groups (e.g. carboxylic groups) on its surface. Then the resulting CC was subjected to repeated water washing and drying at 120 °C.

### **Preparation of ONPPGC/OCC.**

The preoxidized CC (2 cm × 2 cm) was immersed into the 2 ml water solution containing 0.458 ml aniline monomer (5 mmol) under stirring, and then 0.921 mL phytic acid solution (1 mmol) was added into the mixture under stirring. 0.286 g of ammonium persulfate (APS) (1.25 mmol) was dissolved into the 1 mL water under stirring. After cooling down to about 4 °C, both solutions were mixed together and stirred for 2h. The mixture was transferred into a Teflon-lined autoclave, which was sealed and aged statically at 100 °C for 5 h under autogenous pressure. The resultant precipitation was washed with a large amount of water and dried at 60 °C, followed by annealing at 1000 °C for 2h under N<sub>2</sub>. The obtained sample was named ONPPGC/OCC. The weight increment of OCC was directly weighted after the growth of ONPPGC. For ONPPGC/OCC electrode, the loading mass of ONPPGC is 0.1 mgcm<sup>-2</sup>.

---

### **Electrochemical measurements.**

The test solutions were performed with a CHI 660C electrochemistry workstation (Shanghai CHI Instruments Company, China) in a standard three-electrode system using ONPPGC/OCC as the working electrode, a Pt wire as the counter electrode and an Ag/AgCl electrode as the reference electrode. To prepare the Pt/C loaded electrode, The Pt/C catalysts were resuspended in a mixture containing water, isopropanol, and Nafion (10%) (v:v:v 4:1:0.05) to form a 0.5 mg/mL catalyst ink. 2  $\mu$ L catalyst inks was deposited on glassy carbon electrodes ( $0.07\text{ cm}^2$ ) that were polished prior to catalyst deposition by 0.3  $\mu$ m and 0.05  $\mu$ m alumina powder and rinsed by sonication in ethanol and in deionized water. The Pt/C catalysts modified electrode was dried at ambient condition. For Pt/C loaded electrode, the loading mass of Pt/C is  $0.14\text{ mgcm}^{-2}$ . All potentials measured were calibrated to RHE using the following Equation:  $E(\text{RHE})=E(\text{Ag/AgCl})+0.197\text{ V}+0.059\times\text{pH}$ . Polarization curves were obtained using LSV with a scan rate of  $2\text{ mVs}^{-1}$  and no activation was used before recording the polarization curves. The long-term durability test was performed using chronoamperometry and chronopotentiometric measurements. All currents presented are corrected against ohmic potential drop. The electrochemical impedance spectroscopy (EIS) measurement was carried out in a frequency range from 100 kHz to 5 Hz with an AC voltage amplitude of 10 mV at a open circuit potential in 0.5 M  $\text{H}_2\text{SO}_4$  solution.

**Table S1.** Comparison of the electrocatalytic activity of ONPPGC/OCC via some representative solid-state water electrolysis catalysts recently reported for basic solutions.

| Catalyst           | Catalyst amount<br>(mgcm <sup>-2</sup> ) | Current<br>Density j | potential<br>(vs. RHE) at the<br>corresponding j | Reference |
|--------------------|------------------------------------------|----------------------|--------------------------------------------------|-----------|
| NiFe LDH/NF        | N                                        | 10mAcm <sup>-2</sup> | 1.7                                              | 21        |
| NiSe/NF            | 2.8                                      | 10mAcm <sup>-2</sup> | 1.63                                             | 15        |
| Ni <sub>2</sub> P  | 5                                        | 10mAcm <sup>-2</sup> | 1.63                                             | 14        |
| NiFeO <sub>x</sub> | 3                                        | 10mAcm <sup>-2</sup> | 1.51                                             | 20        |
| Pt/C               | 0.14                                     | 10mAcm <sup>-2</sup> | 1.69                                             | This work |
| ONPPGC/OCC         | 0.1                                      | 10mAcm <sup>-2</sup> | 1.66                                             | This work |

**Table S2.** Element compositions of ONPPGC/OCC samples.

|                         | Molar<br>ratio | C at. % | O at. % | N at. % | P at. % |
|-------------------------|----------------|---------|---------|---------|---------|
| Aniline:<br>phytic acid | 3:1            | 82.7    | 16.5    | 0.39    | 0.38    |
| Aniline:<br>phytic acid | 5:1            | 82.8    | 16.4    | 0.46    | 0.32    |
| Aniline:<br>phytic acid | 7:1            | 83.0    | 16.2    | 0.57    | 0.18    |

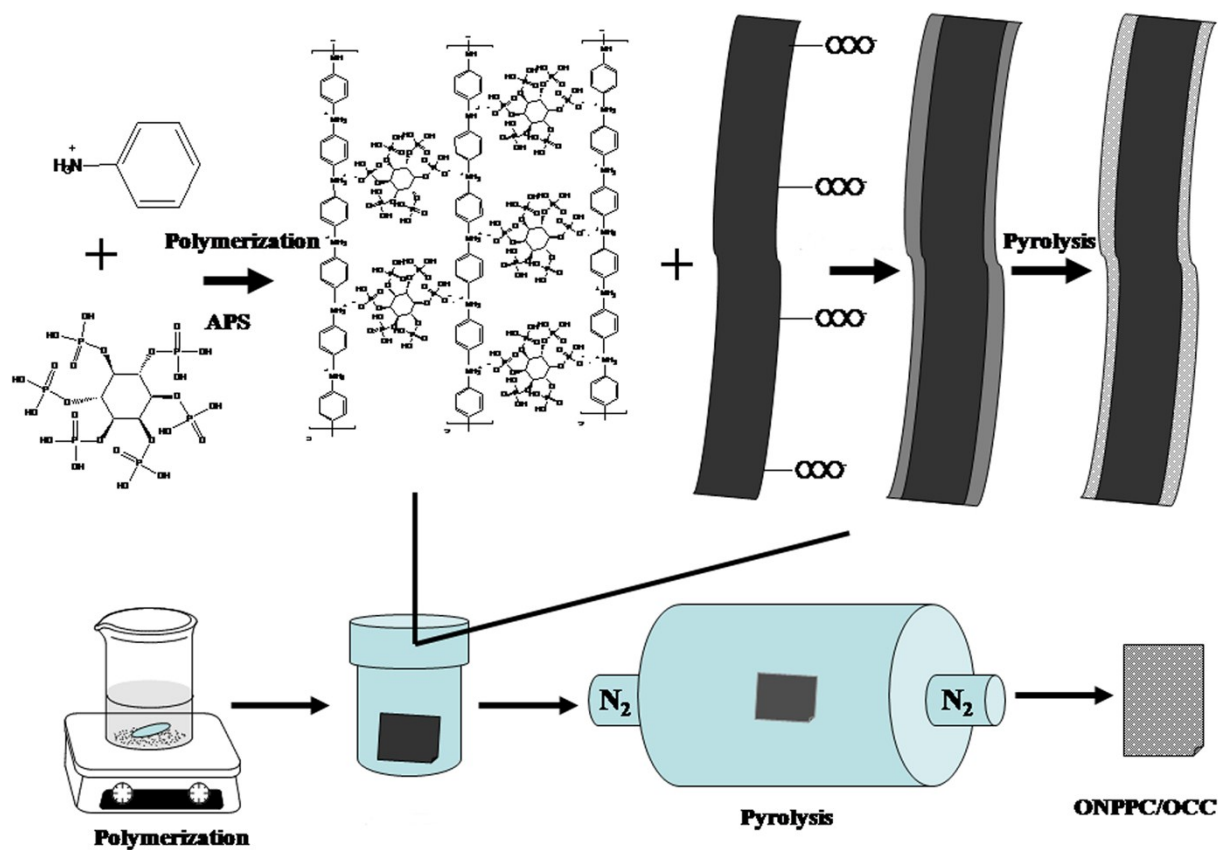

**Figure S1.** Fabrication of O, N and P tri-doped mesoporous graphite nanocarbon foams directly grown on oxidized carbon cloth.

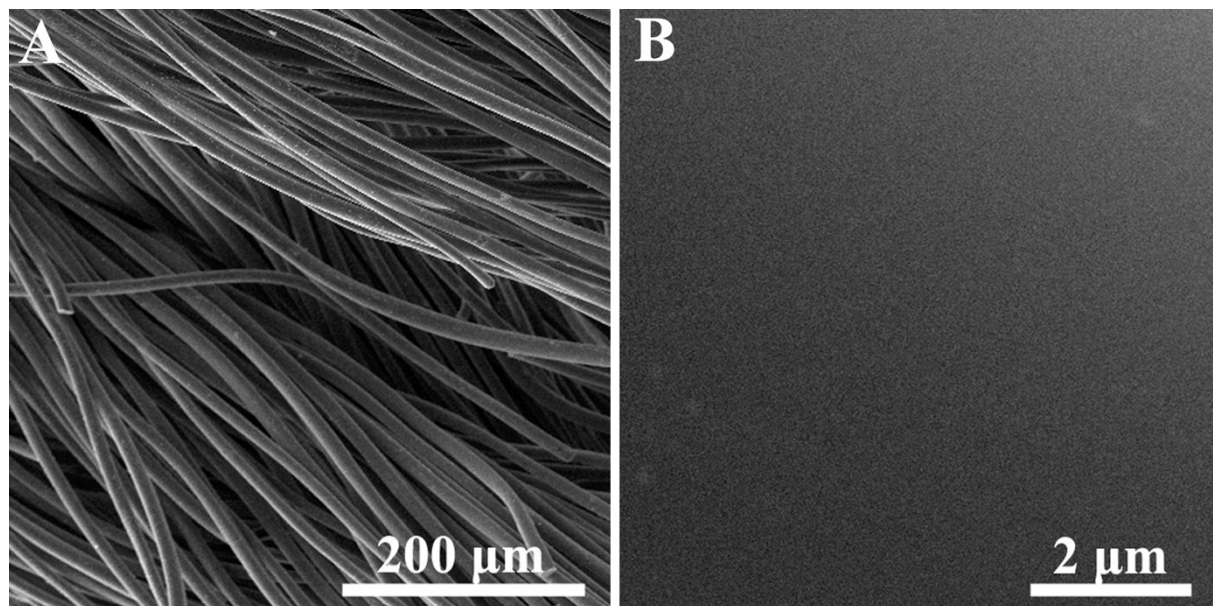

**Figure S2.** SEM image of OCC.

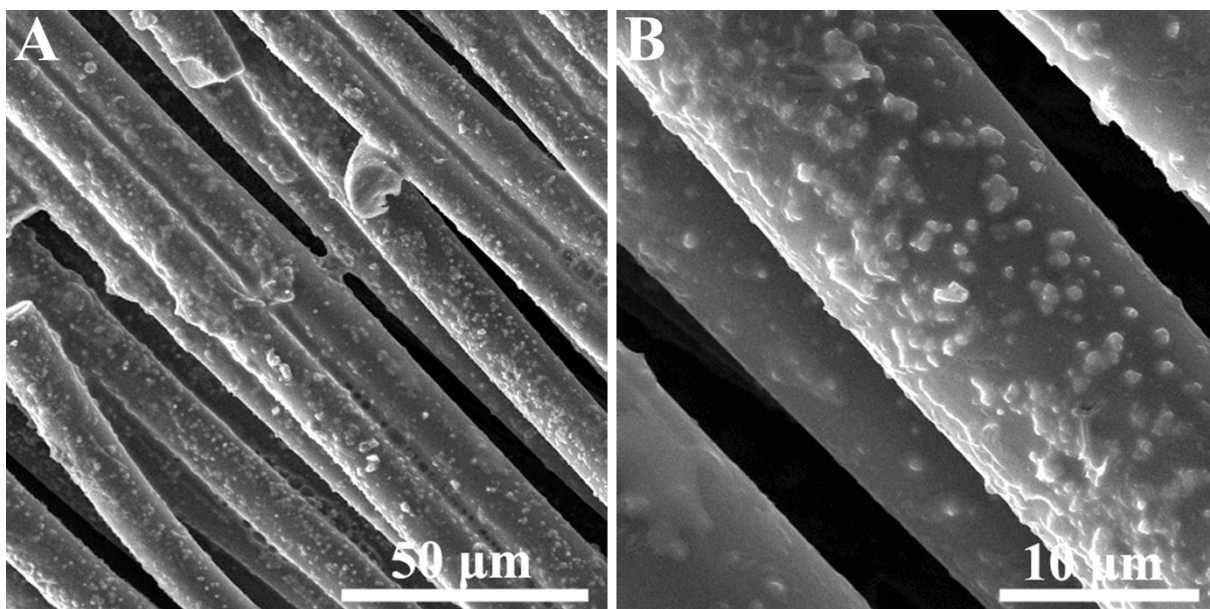

**Figure S3.** SEM image of polyaniline hydrogel on OCC surfaces.

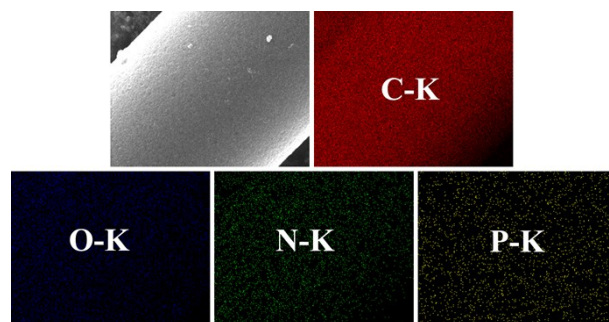

**Figure S4.** SEM images of the ONPPGC/OCC and corresponding EDX elemental mapping images.

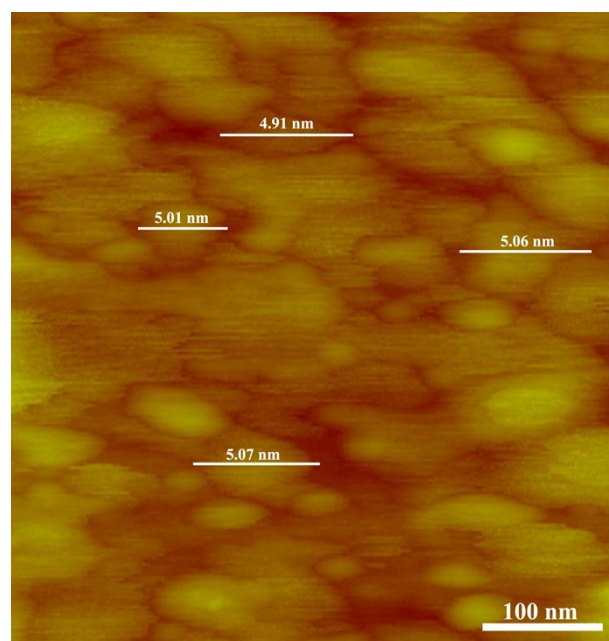

**Figure S5.** AFM images of ONPPGC.

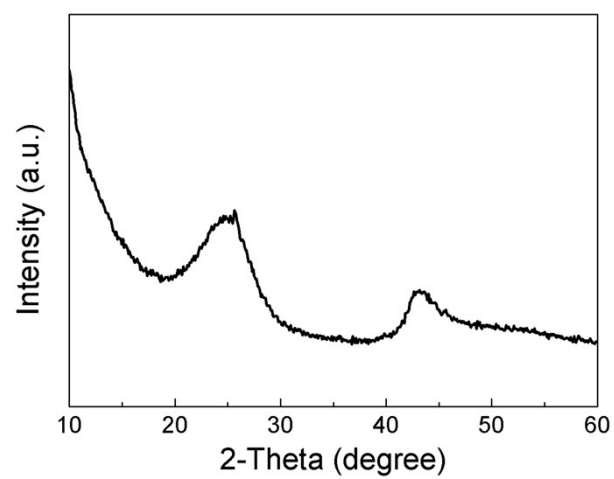

**Figure S6.** XRD pattern of ONPPGC/OCC.



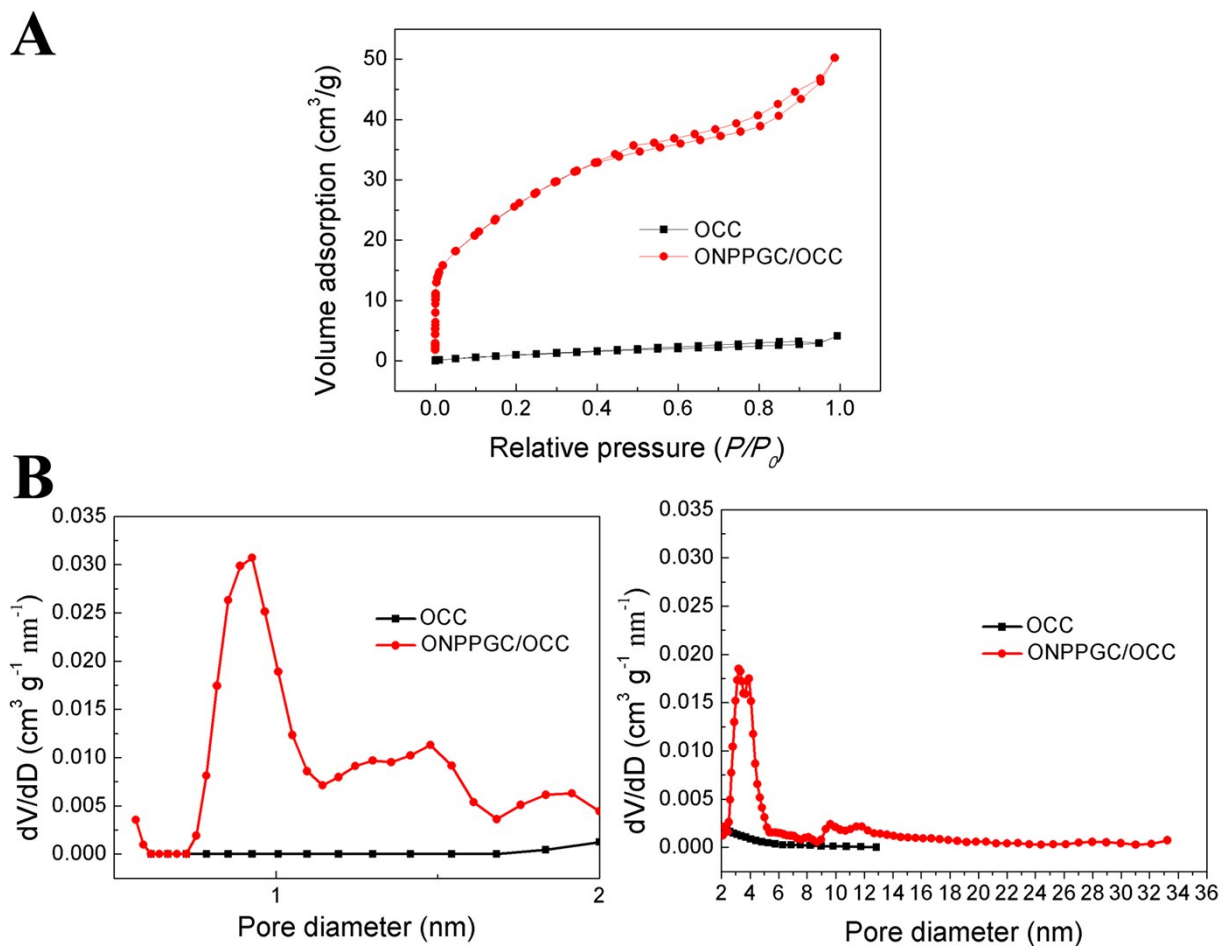

**Figure S7.** (A)  $\text{N}_2$  adsorption–desorption isotherms (B) and corresponding DFT pore size distribution curves for OCC and ONPPGC/OCC.

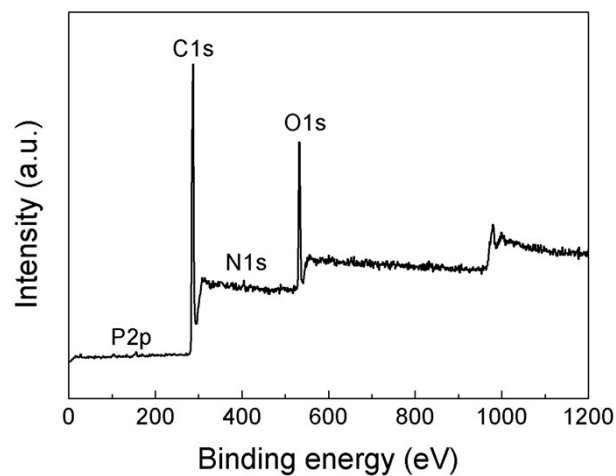

**Figure S8.** XPS survey spectrum of ONPPGC/OCC.

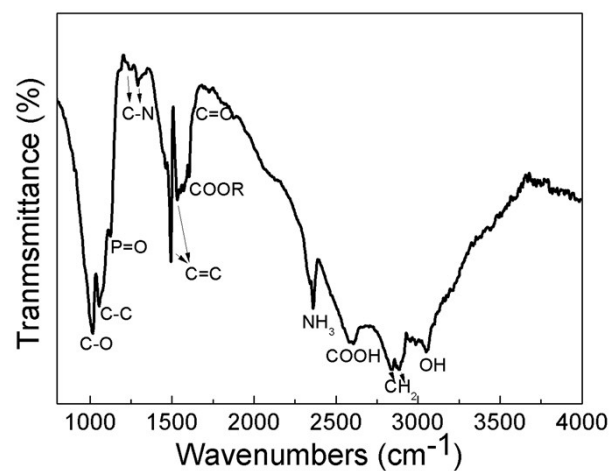

**Figure S9.** FTIR of ONPPGC/OCC.

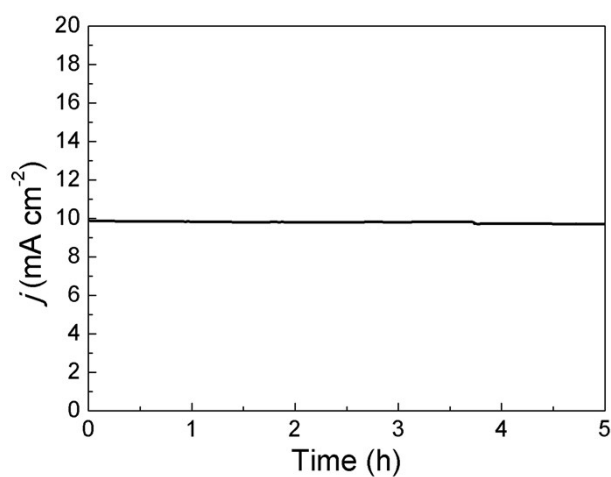

**Figure S10.** A current density-time ( $j$ - $t$ ) curve obtained for OER with ONPPGC/OCC at 1.65 V (vs. RHE) in an alkaline solution (1 M KOH, pH = 14).

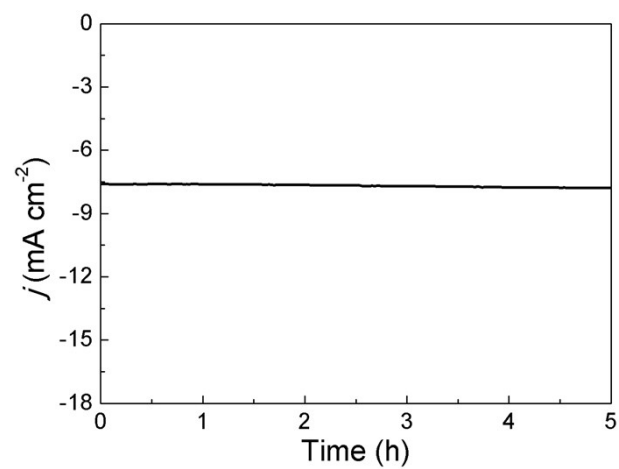

**Figure S11.** A current density-time ( $j$ - $t$ ) curve obtained for HER with ONPPGC/OCC at -0.4 V (vs. RHE) in an alkaline solution (1 M KOH, pH = 14).

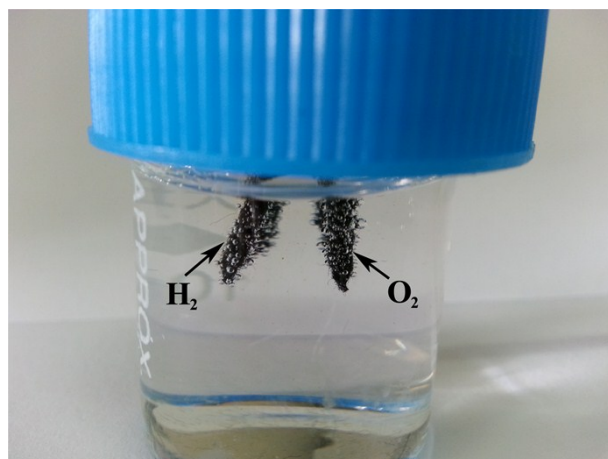

**Figure S12.** Photograph of the system showing the hydrogen (left) and oxygen (right) generation during water electrolysis.

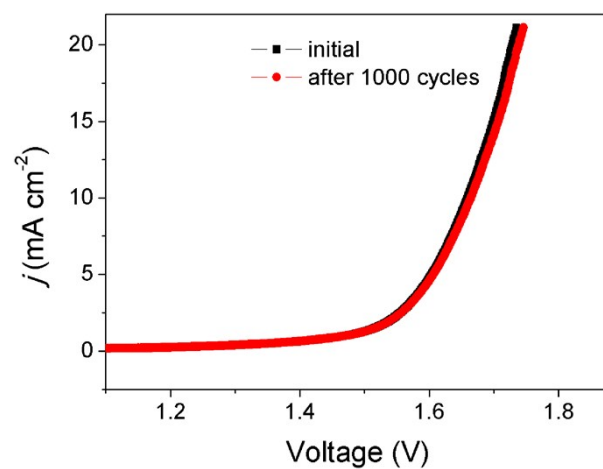

**Figure S13.** LSV curves for ONPPGC/OCC before and after 1000 CV cycles in 1.0 M KOH.

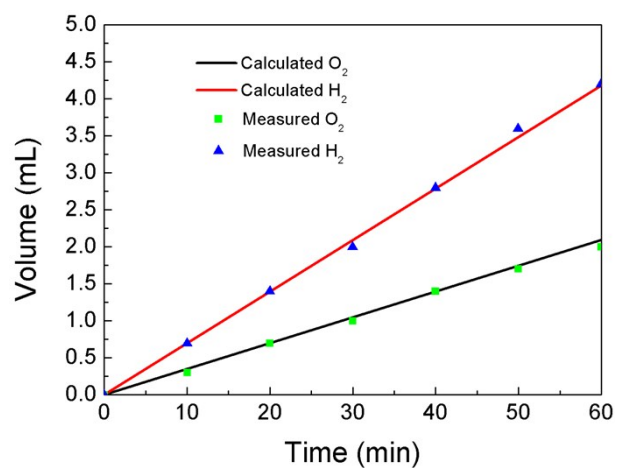

**Figure S14.** The amount of gas theoretically calculated and experimentally measured versus time for overall water splitting of ONPPGC/OCC.

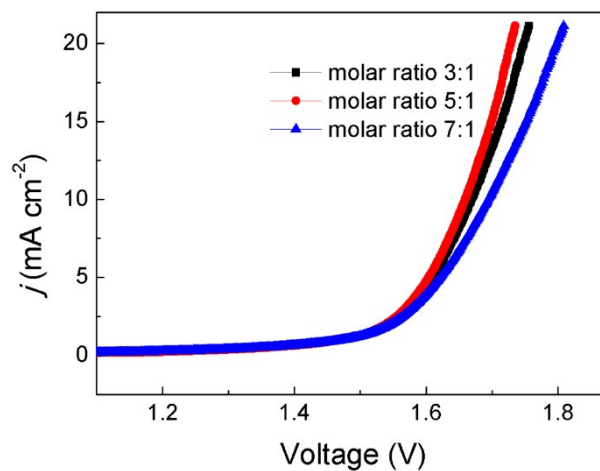

**Figure S15.** LSV curves of water electrolysis for ONPPGC/OCC (ONPPGC prepared with various molar ratios of aniline to phytic acid) in a two-electrode configuration with a scan rate of 2 mVs<sup>-1</sup> in 1.0 M KOH.

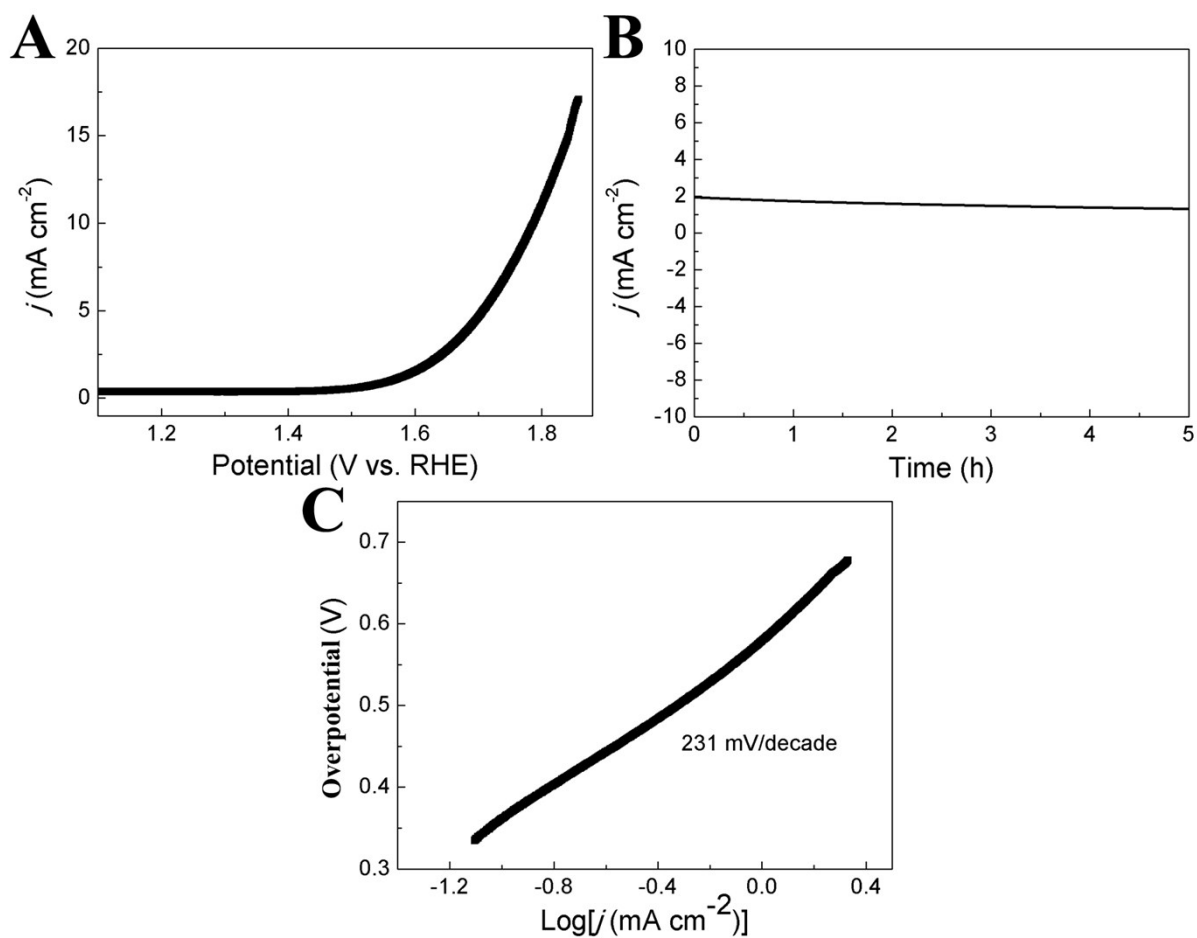

**Figure S16.** (A) LSV curves for ONPPGC/OCC with a scan rate of 2 mVs<sup>-1</sup> for OER. (B) A current density-time (*j*-*t*) curve obtained for OER with ONPPGC/OCC at 1.65 V (vs. RHE). (C) The corresponding Tafel plots. All experiments were carried out in 0.2 M PBS.

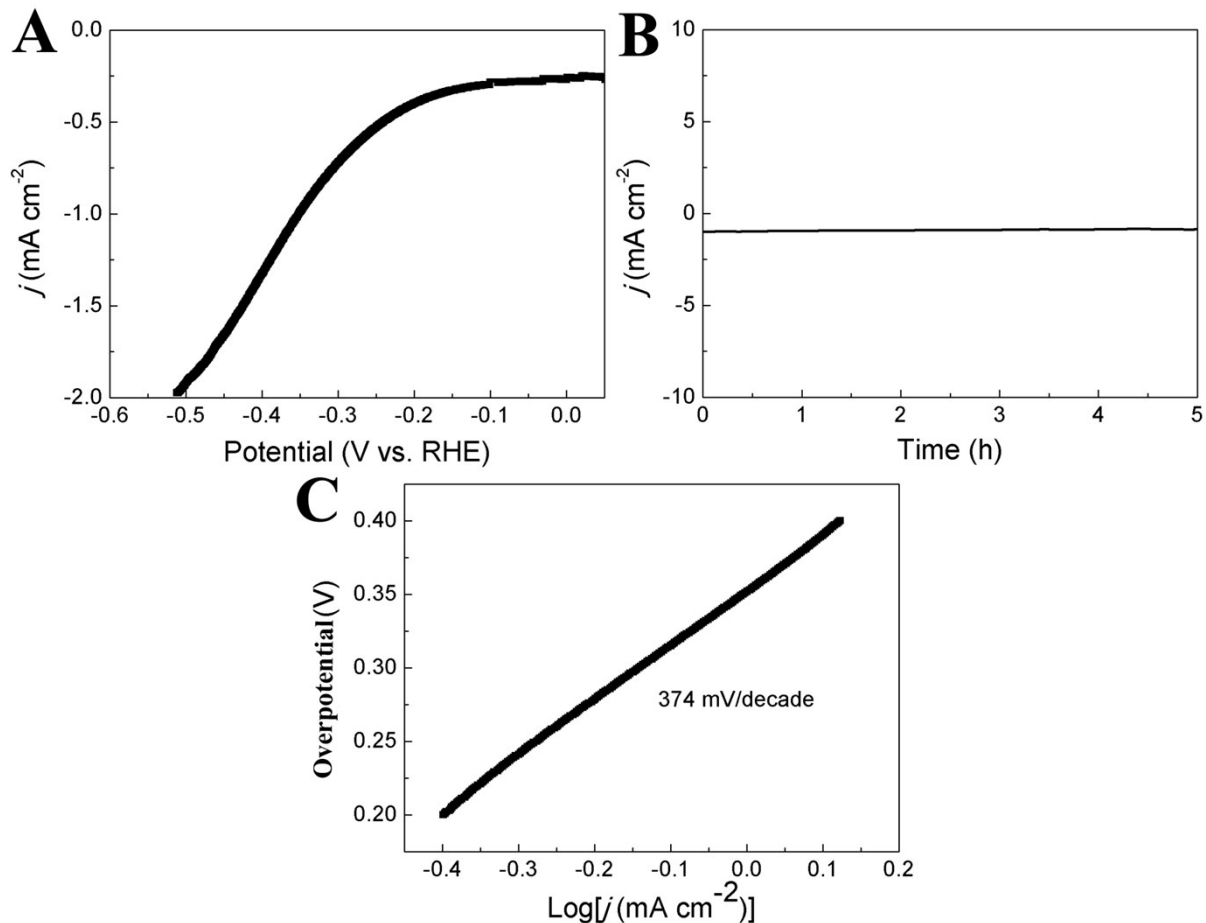

**Figure S17.** (A) LSV curves for ONPPGC/OCC with a scan rate of 2 mVs<sup>-1</sup> for HER. (B) A current density-time (*j*-*t*) curve obtained for HER with ONPPGC/OCC at -0.35 V (vs. RHE). (C) The corresponding Tafel plots. All experiments were carried out in 0.2 M PBS.

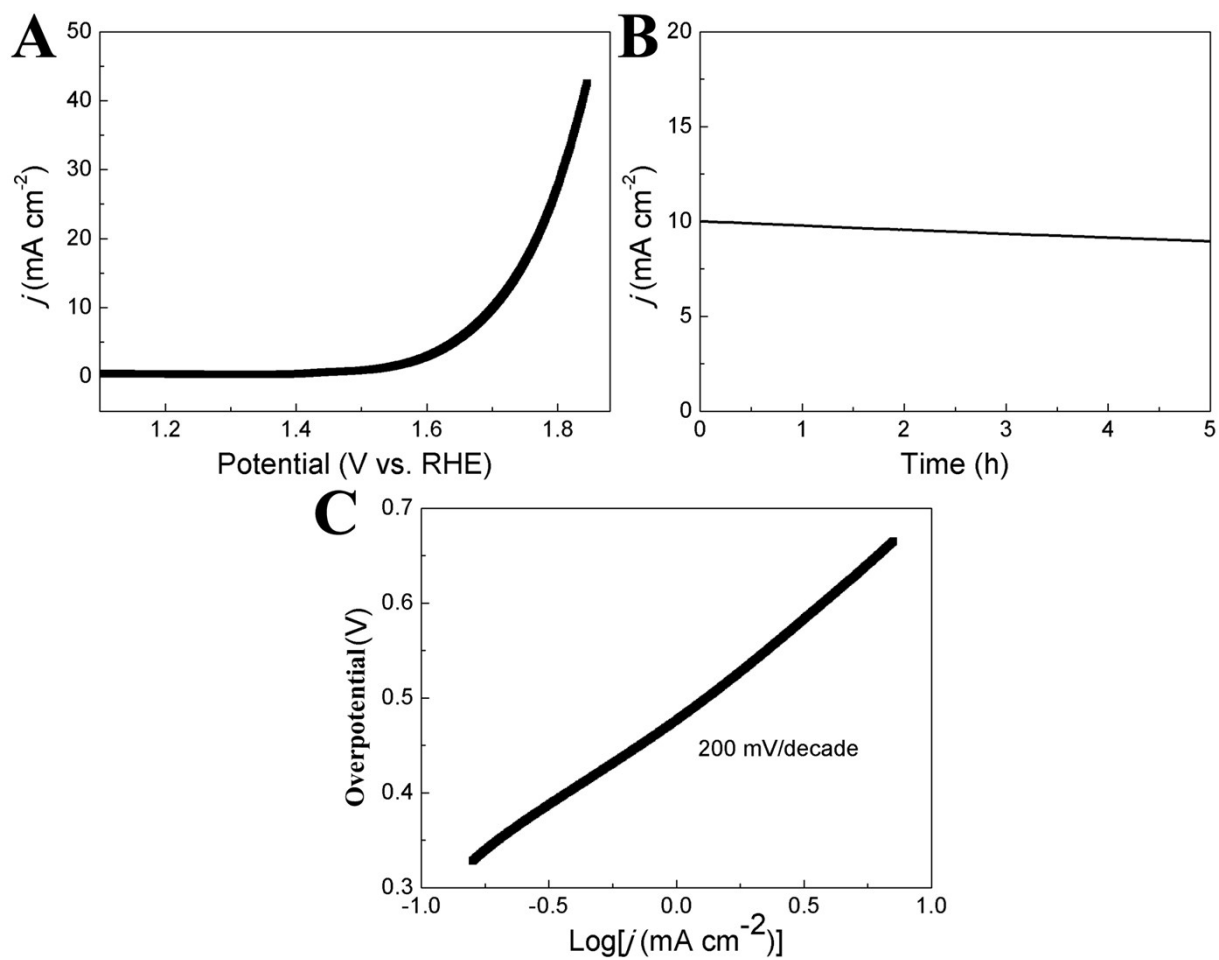

**Figure S18.** (A) LSV curves for ONPPGC/OCC with a scan rate of 2 mVs<sup>-1</sup> for OER. (B) A current density-time ( $j$ -t) curve obtained for OER with ONPPGC/OCC at 1.70 V (vs. RHE). (C) The corresponding Tafel plots. All experiments were carried out in 0.5 M H<sub>2</sub>SO<sub>4</sub>.

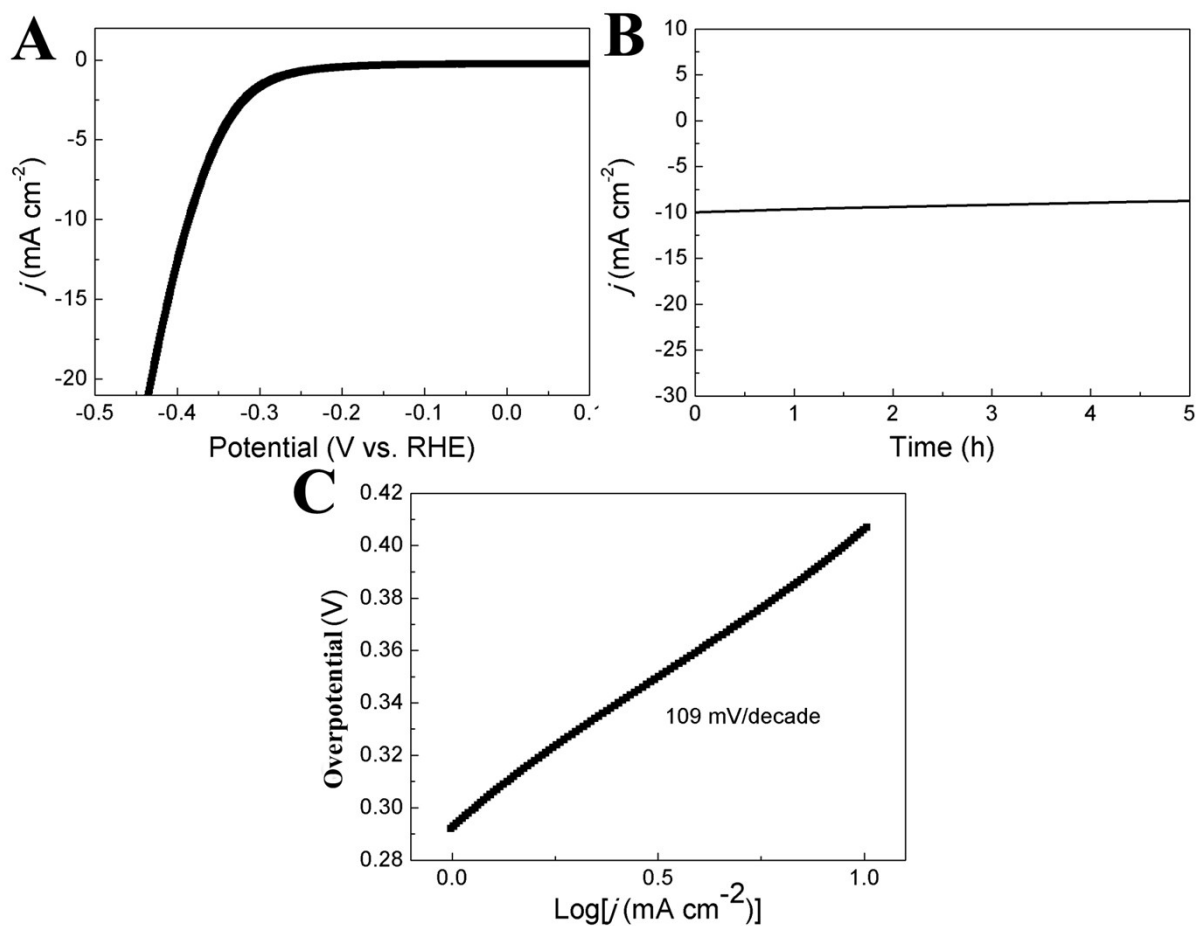

**Figure S19.** (A) LSV curves for ONPPGC/OCC with a scan rate of 2 mVs<sup>-1</sup> for HER. (B) A current density-time ( $j$ - $t$ ) curve obtained for HER with ONPPGC/OCC at -0.39 V (vs. RHE). (C) The corresponding Tafel plots. All experiments were carried out in 0.5 M H<sub>2</sub>SO<sub>4</sub>.

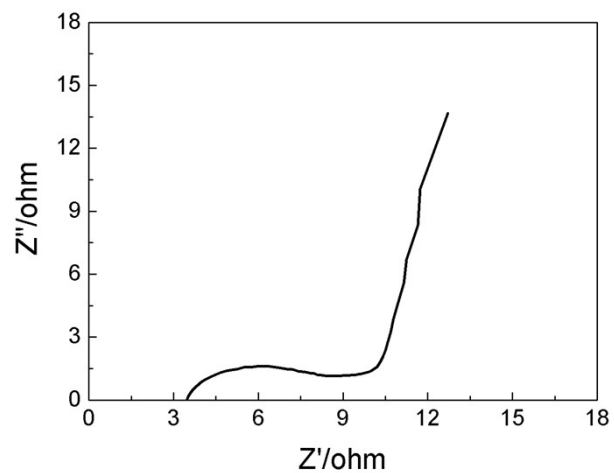

**Figure S20.** EIS of the ONPPGC/OCC electrodes.



---

**Movie S1.** Movie of the system showing the oxygen (left) and hydrogen (right) generation during water electrolysis in 1.0 M KOH.
